# Supplementary material for: Coaxial bioprinting of a stentable and endothelialized human coronary artery-sized in vitro model
Source: Royal Society of Chemistry journal article supplement (doi:10.1039/d4tb00601a), 2024-01-01
Supplement: d4tb00601a2.pdf [file d4tb00601a2.pdf]

## Supplementary Material

### Coaxial bioprinting of stentable and endothelialized human coronary artery-sized in vitro model

*Ashfaq Ahmad*<sup>a,b</sup>, *Seon-Jin Kim*<sup>c</sup>, *Yun-Jin Jeong*<sup>d</sup>, *Muhammad Soban Khan*<sup>e</sup>, *Jinsoo Park*<sup>e</sup>,  
*Dong-Weon Lee*<sup>e</sup>, *Changho Lee*<sup>f,g</sup>, *Yeong-Jin Choi*<sup>h,\*</sup>, and *Hee-Gyeong Yi*<sup>a,b,\*</sup>

a Department of Convergence Biosystems Engineering, Chonnam National University, Gwangju 61186, Republic of Korea.

b Interdisciplinary Program in IT-Bio Convergence System, Chonnam National University

c School of Interdisciplinary Bioscience and Bioengineering, Pohang University of Science and Technology (POSTECH), Pohang 37666, Republic of Korea.

d Department of Automatic System, Chosun College of Science & Technology, Gwangju, 61453, Republic of Korea

e Department of Mechanical Engineering, Chonnam National University, Gwangju 61186, Republic of Korea

f Department of Artificial Intelligence Convergence, Chonnam National University, Gwangju, 61186, Republic of Korea

g Department of Nuclear Medicine, Chonnam National University Medical School and Hwasun Hospital, 58128, Republic of Korea

h Department of Advanced Biomaterials Research, Korea Institute of Materials Science (KIMS), Changwon 51508, Republic of Korea

\*Co-corresponding authors: Hee-Gyeong Yi: [hgyi@jnu.ac.kr](mailto:hgyi@jnu.ac.kr), Yeong-Jin Choi: [jinchoi@kims.re.kr](mailto:jinchoi@kims.re.kr)

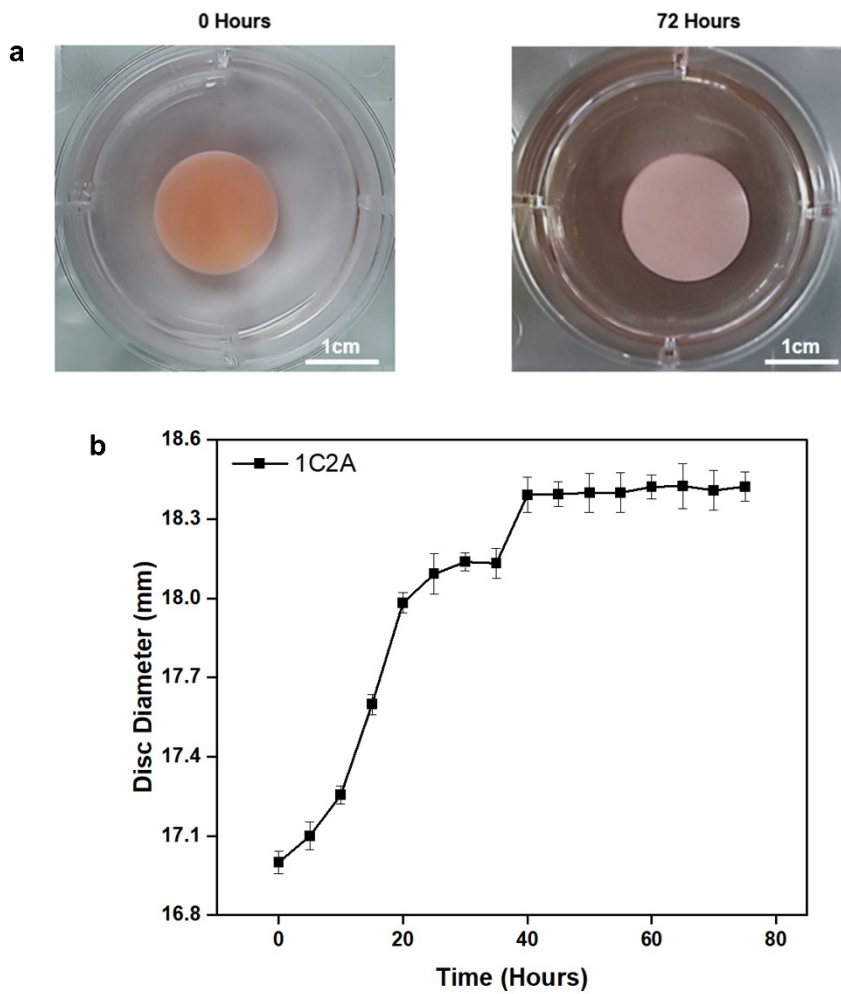

**Figure S1. Change in diameter of gel disc due to water uptake.** a) Representative Images at before and after 72 hours of media immersion. b) Quantification of change in disc diameter due to water uptake.

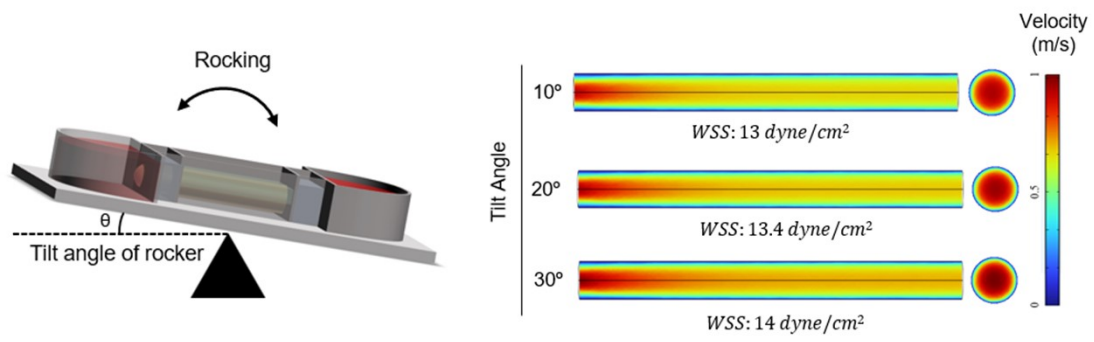

**Figure S2.** Schematic of the gravity-driven (pumpless) flow platform and WSS values obtained from CFD simulation at varying tilt angles of rocker.

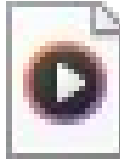

# Movie-S1.avi

**Movie S1:** Stentable performance of tubular construct.
